# Supplementary material
Source: bioRxiv or medRxiv preprint supplement (https://medrxiv.org/highwire/filestream/81100/field_highwire_adjunct_files/3/2020.05.13.20101022-4.pdf)
Supplement: Supplementary file [file 2020.05.13.20101022-4.pdf]

**Appendix 4** shows the ratio of negative COVID-19 tests to 1 positive COVID-19 test, and the number of COVID-19 tests per 1,000,000 in the population for each of the 7 countries included in our analysis, as of May 10, 2020.

|                    | <b>Total Tests to Positive Tests Ratio</b> | <b>Tests per 1M</b> |
|--------------------|--------------------------------------------|---------------------|
| <b>Australia</b>   | 119.27                                     | 32,466              |
| <b>Austria</b>     | 19.94                                      | 35,143              |
| <b>Iceland</b>     | 30.09                                      | 158,816             |
| <b>Israel</b>      | 27.63                                      | 52,598              |
| <b>Germany</b>     | 16.04                                      | 32,891              |
| <b>New Zealand</b> | 127.39                                     | 39,468              |
| <b>South Korea</b> | 61.05                                      | 12,949              |
